# Supplementary material
Source: Research Square preprint supplement (doi:10.21203/rs.3.rs-9995159/v1)
Supplement: Supplementary file 2 [file 8f496935174cb5e17863af9b.pdf]

## Online Resource 3 — Questionnaires

*Motor resonance in observed digital musical interactions: a time-resolved grip force study*

Psychological Research

Olivier Capra and Florent Berthaut

Corresponding author: [olivier.capra@univ-catholille.fr](mailto:olivier.capra@univ-catholille.fr)

## Pre-experiment Questionnaire

| French                                                                                                                                                                                                                       | English                                                                                                                                                                                              |
|------------------------------------------------------------------------------------------------------------------------------------------------------------------------------------------------------------------------------|------------------------------------------------------------------------------------------------------------------------------------------------------------------------------------------------------|
| Sexe                                                                                                                                                                                                                         | Gender                                                                                                                                                                                               |
| Âge (en années)                                                                                                                                                                                                              | Age (in years)                                                                                                                                                                                       |
| Sur une échelle de 1 à 5, quelle est la qualité de votre vision (avec lunettes si vous en portez ; 1 = mauvaise, 5 = très bonne) ?                                                                                           | On a scale of 1 to 5, how would you rate the quality of your vision (with glasses if you wear them; 1 = poor, 5 = very good)?                                                                        |
| Avez-vous besoin d'une correction oculaire pour lire ?                                                                                                                                                                       | Do you need vision correction to read?                                                                                                                                                               |
| Si oui, l'avez-vous sur vous ?                                                                                                                                                                                               | If yes, do you have it with you?                                                                                                                                                                     |
| Sur une échelle de 1 à 5, quelle est la qualité de votre audition ?                                                                                                                                                          | On a scale of 1 to 5, how would you rate the quality of your hearing?                                                                                                                                |
| Avez-vous besoin d'une aide auditive pour entendre confortablement ?                                                                                                                                                         | Do you need a hearing aid to hear comfortably?                                                                                                                                                       |
| Si oui, l'avez-vous sur vous ?                                                                                                                                                                                               | If yes, do you have it with you?                                                                                                                                                                     |
| Avez-vous eu par le passé un accident impliquant un membre supérieur nécessitant une intervention médicale ? (bras cassé, entorse, fracture...)                                                                              | Have you ever had an accident involving an upper limb that required medical intervention? (e.g., broken arm, sprain, fracture)                                                                       |
| <i>(Si oui)</i> Avec le consentement du participant, indiquez les détails qui pourraient impacter l'expérimentation (événement récent, douleur/sensation persistante, fatigue musculaire, perte de sensibilité dans la main) | <i>(If yes)</i> With the participant's consent, provide details that could impact the experiment (recent event, persistent pain/sensation, specific muscle fatigue, loss of sensitivity in the hand) |
| Parmi les phrases suivantes, laquelle n'a pas de sens ?                                                                                                                                                                      | Which of the following sentences does not make sense?                                                                                                                                                |
| Diriez-vous que ce son est plutôt : Grave / Aigu / Ni l'un, ni l'autre ?                                                                                                                                                     | Would you say this sound is rather: Low-pitched / High-pitched / Neither?                                                                                                                            |

**Handedness assessment** — Indicate the **hand** you use most for each activity (or “no preference”):

| French               | English         |
|----------------------|-----------------|
| Écrire               | Writing         |
| Dessiner             | Drawing         |
| Lancer une balle     | Throwing a ball |
| Utiliser des ciseaux | Using scissors  |

| French                                     | English                               |
|--------------------------------------------|---------------------------------------|
| Se brosser les dents                       | Brushing your teeth                   |
| Couper au couteau                          | Cutting with a knife                  |
| Utiliser une cuillère                      | Using a spoon                         |
| Utiliser un balai (main en haut du manche) | Using a broom (hand at top of handle) |
| Gratter une allumette                      | Striking a match                      |

**Laterality (foot)** — Indicate the **foot** you use most for each activity (or “no preference”):

| French                            | English                        |
|-----------------------------------|--------------------------------|
| Tirer/Shooter dans un ballon      | Kicking a ball                 |
| Monter à l'échelle (premier pied) | Climbing a ladder (first foot) |

---

## Post-experiment Questionnaire

| French                                                                                                                                                                                                                                                                                                                                                                                                                                                                                                                                                                                                                                                                                                                                                                                                                                                                                                                                                                                                                                                                                                                                                                                                                                                          | English                                                                                                                                                                                                                                                                                                                                                                                                                                                                                                                                                                                                                                                                                                                                                                                                                                                                                                                                                                                                                                                      |
|-----------------------------------------------------------------------------------------------------------------------------------------------------------------------------------------------------------------------------------------------------------------------------------------------------------------------------------------------------------------------------------------------------------------------------------------------------------------------------------------------------------------------------------------------------------------------------------------------------------------------------------------------------------------------------------------------------------------------------------------------------------------------------------------------------------------------------------------------------------------------------------------------------------------------------------------------------------------------------------------------------------------------------------------------------------------------------------------------------------------------------------------------------------------------------------------------------------------------------------------------------------------|--------------------------------------------------------------------------------------------------------------------------------------------------------------------------------------------------------------------------------------------------------------------------------------------------------------------------------------------------------------------------------------------------------------------------------------------------------------------------------------------------------------------------------------------------------------------------------------------------------------------------------------------------------------------------------------------------------------------------------------------------------------------------------------------------------------------------------------------------------------------------------------------------------------------------------------------------------------------------------------------------------------------------------------------------------------|
| Jouez-vous de la musique ?<br>( <i>Si oui</i> ) De quel(s) instrument(s) jouez-vous ?<br>( <i>Pour chaque instrument</i> ) Nombre d'années de pratique ?<br>Parmi les genres de musique suivants, le ou lesquels se rapprochent le plus de ceux que vous préférez ?<br>Pouvez-vous donner des exemples d'artistes, de groupes ou de styles musicaux qui se rapprochent de votre pratique musicale ?<br>Si vous avez arrêté de jouer de la musique, depuis combien d'années ?<br>( <i>Répondre 0 si vous continuez</i> )<br>Combien d'années de pratique de la musique électronique avez-vous ?<br>Utilisez-vous des interfaces graphiques pour jouer de la musique ? ( <i>Précisez lesquelles</i> )<br>Selon vous, un séquenceur permet-il de lire des samples ?<br>À quelle fréquence environ assistez-vous à des concerts ?<br>Depuis combien d'années allez-vous à des concerts ? ( <i>Indiquez 0 si vous n'y allez pas</i> )<br>À quel type de concerts allez-vous ?<br>Pouvez-vous donner des exemples d'artistes, de groupes ou de styles musicaux de concerts auxquels vous rendez ?<br>À quelle fréquence allez-vous à des concerts de musique électronique ?<br>Depuis combien d'années environ assistez-vous à des concerts de musique électronique ? | Do you play music?<br>( <i>If yes</i> ) What instrument(s) do you play?<br>( <i>For each instrument</i> ) Number of years of practice?<br>Which of the following music genres are closest to your preferences?<br><br>Can you provide examples of artists, groups, or musical styles close to your musical practice?<br><br>If you have stopped playing music, how many years ago? ( <i>Answer 0 if you still play</i> )<br>How many years of electronic music practice do you have?<br>Do you use graphical or visual interfaces to play music? ( <i>Please specify which ones</i> )<br>In your opinion, can a sequencer play samples?<br>Approximately how often do you attend concerts?<br>How many years have you been attending concerts? ( <i>Answer 0 if you do not attend</i> )<br>What type of concerts do you attend?<br>Can you provide examples of artists, groups, or musical styles of concerts you attend?<br><br>How often do you attend electronic music concerts?<br>For how many years have you been attending electronic music concerts? |

| French                                                                                    | English                                                                          |
|-------------------------------------------------------------------------------------------|----------------------------------------------------------------------------------|
| Connaissez-vous l'instrument utilisé dans les vidéos ou des instruments du même type ?    | Were you familiar with the instrument used in the videos or similar instruments? |
| Avez-vous déjà assisté à des concerts où les artistes jouent avec ce type d'instruments ? | Have you ever attended concerts where artists play with this type of instrument? |
| Avez-vous déjà joué avec ce type d'instruments ?                                          | Have you ever played with this type of instrument?                               |
| Avez-vous des remarques ou questions à propos de votre expérience durant cette étude ?    | Do you have any remarks or questions about your experience during this study?    |
